# Supplementary material for: Spatial and temporal patterns of gene expression during neurogenesis in the sea urchin Lytechinus variegatus
Source: PubMed Central journal article supplement (PMC6371548; doi:10.1186/s13227-019-0115-8), 2019-02-12

Additional Figure S1: Sense probes of transcription factors expressed in the apical organ

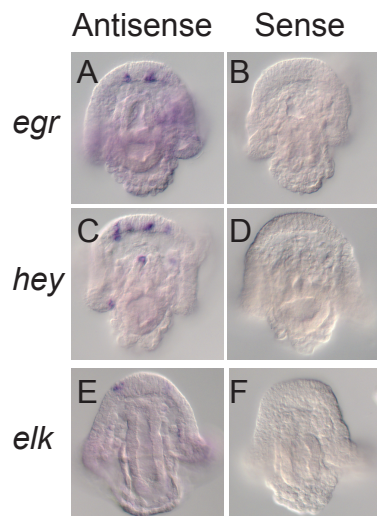

Additional Figure S2: Sense probes of transcription factors expressed in or near the ciliary band

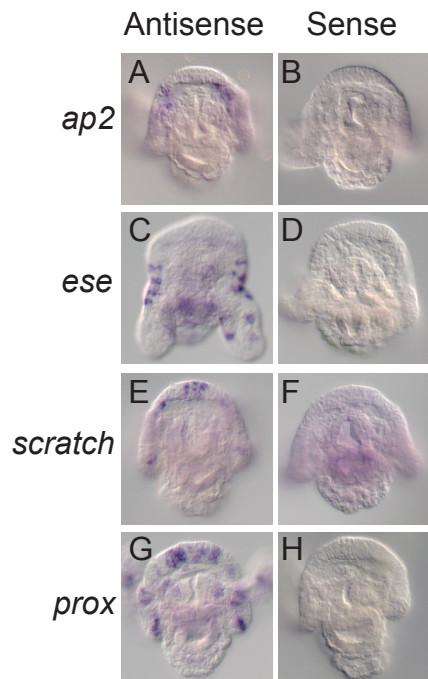



Additional Figure S3: Sense probes of transcription factors expressed in the foregut

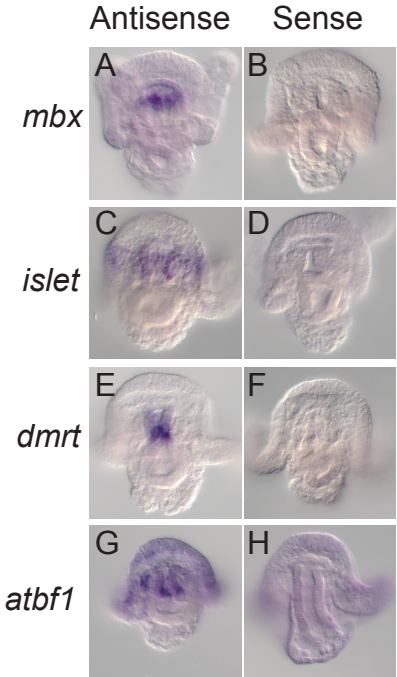

Additional Figure S4: Sense probe  
expression of axon guidance molecules

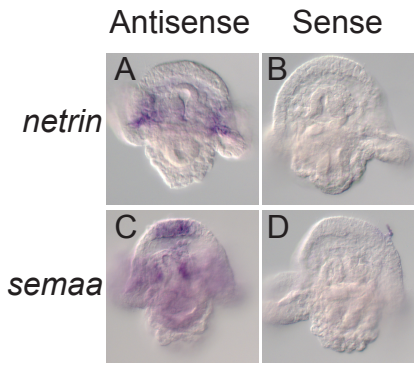

Additional Figure S5: Sense probes of genes involved in neural survival or proliferation

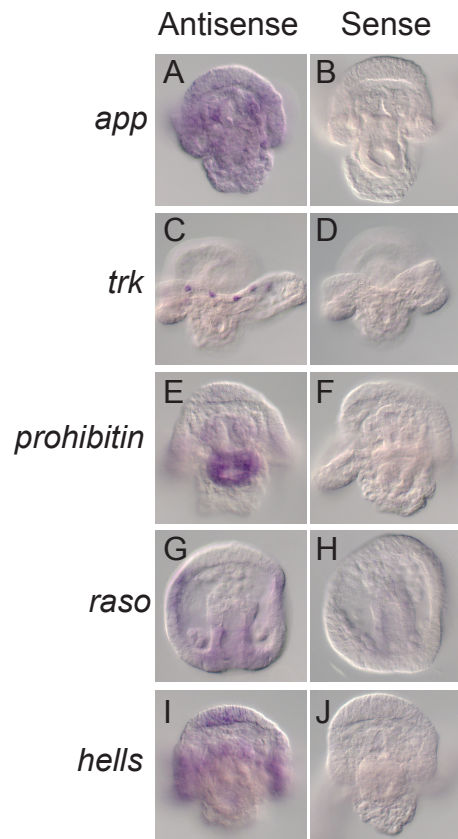

Additional Figure S6: Sense probes of neurotransmitter related genes

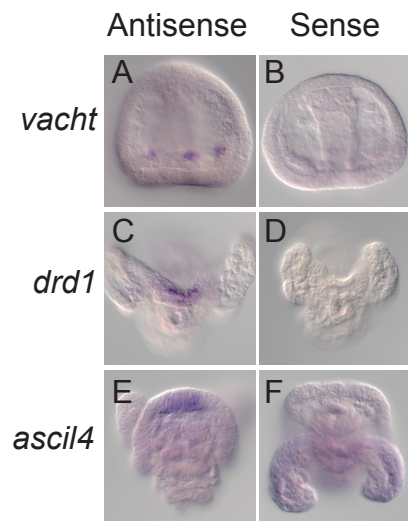

Supplement: 13227_2019_115_MOESM1_ESM.pdf [file 13227_2019_115_MOESM1_ESM.pdf]
